# Supplementary material for: Dysregulation of Transcription Factor Networks Unveils Different Pathways in Human Papillomavirus 16-Positive Squamous Cell Carcinoma and Adenocarcinoma of the Uterine Cervix
Source: PubMed Central journal article supplement (PMC8170088; doi:10.3389/fonc.2021.626187), 2021-05-19
Supplement: Image_1.pdf [file Image_1.pdf]

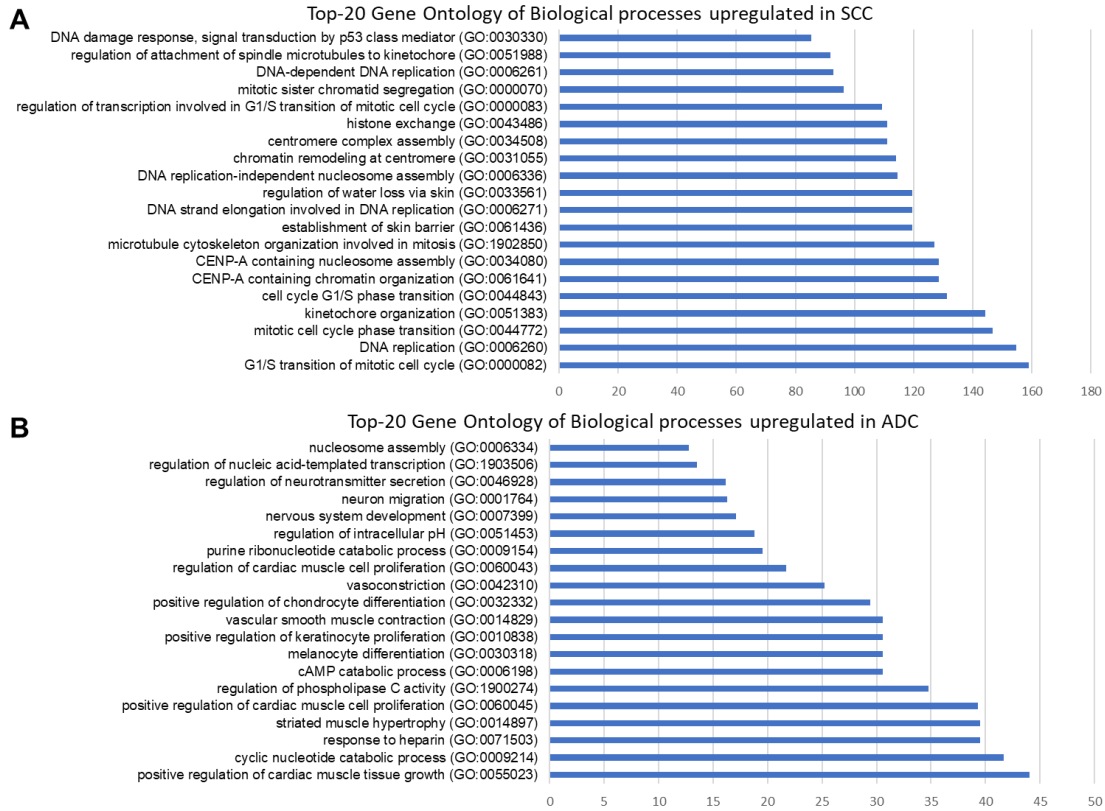

**Supplementary Figure 1.** Biological processes of upregulated genes in cervical SCC (A) or upregulated in ADC (B), based in Gene Ontology (biological processes) performed by Enrichr [11]. The top-20 combined ranking values of Biological processes (axis-x), p-value < 0.01.
