# Supplementary material for: Dysregulation of Transcription Factor Networks Unveils Different Pathways in Human Papillomavirus 16-Positive Squamous Cell Carcinoma and Adenocarcinoma of the Uterine Cervix
Source: PubMed Central journal article supplement (PMC8170088; doi:10.3389/fonc.2021.626187), 2021-05-19
Supplement: Image_2.pdf [file Image_2.pdf]

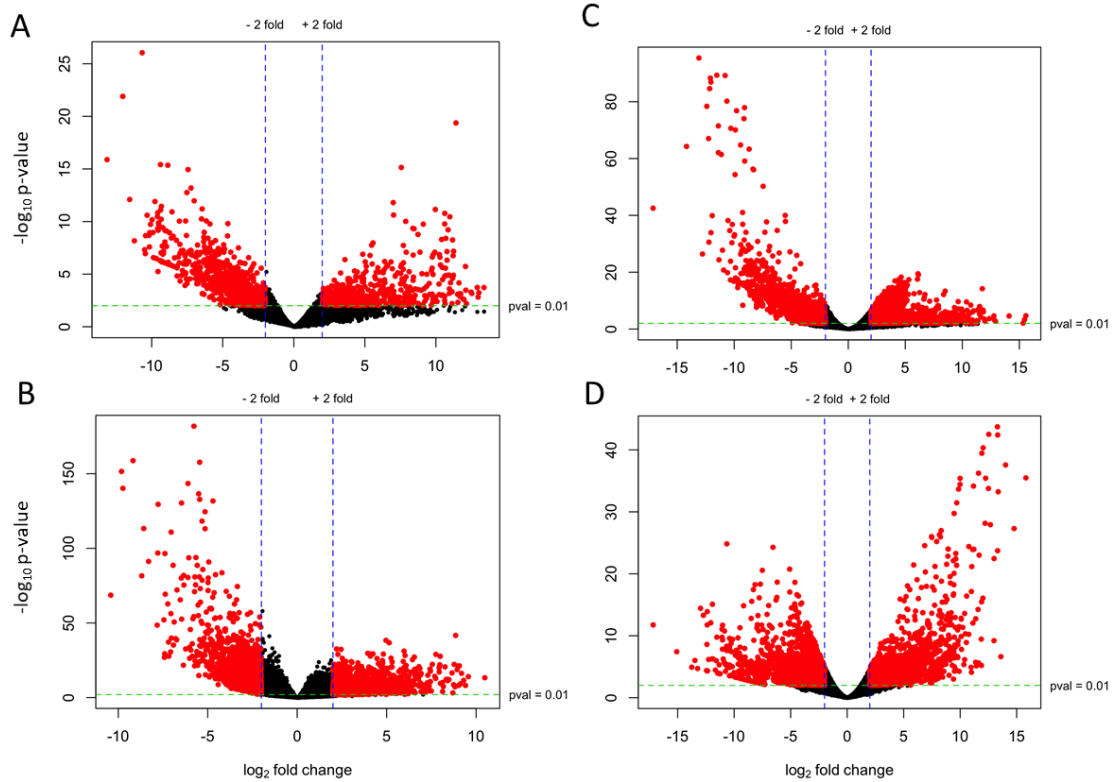

**Supplementary Figure 2.** Volcano plot of differentially expressed genes among different comparisons of cervical samples: cervical squamous cell carcinoma (SCC), adenocarcinoma (ADC) from our study and from the TCGA, and non-cervical carcinoma cervix tissue (non-CC) [10]. Each dot is an expressed gene. In red, the differentially expressed genes with  $|\log_2\text{FC}| > 2$  (blue dashed line) and  $p < 0.01$  (green dashed line). Differentially expressed genes between SCC and ADC in our samples (A), in TCGA samples (B), and SSC (C) and ADC (D) versus non-CC cervical samples.
