# Supplementary material for: Dysregulation of Transcription Factor Networks Unveils Different Pathways in Human Papillomavirus 16-Positive Squamous Cell Carcinoma and Adenocarcinoma of the Uterine Cervix
Source: PubMed Central journal article supplement (PMC8170088; doi:10.3389/fonc.2021.626187), 2021-05-19
Supplement: Image_3.pdf [file Image_3.pdf]

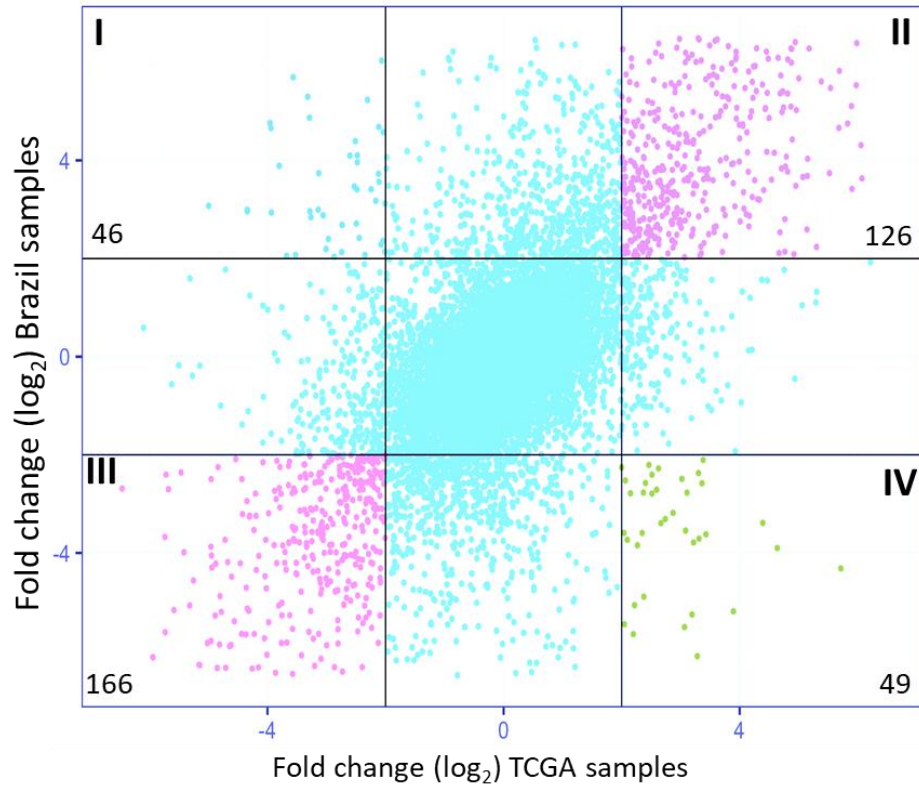

**Supplementary Figure 3.** Scatter plot shows the expression signature of differentially expressed genes between cervical squamous cell carcinoma (SCC) and adenocarcinoma (ADC) samples from our study (x-axis) and from the cancer genome atlas (TCGA) consortium (y-axis). Quadrant II shows 126 genes upregulated in SCC, while 166 genes downregulated in SCC samples in both cohorts (Quadrant III). FC: fold change (log<sub>2</sub>); False discovery rate (FDR) < 0.01 was defined as the limit of significance.
